# Supplementary material for: Anything but Shadowing! Early Clinical Reasoning in Emergency Department Improves Clinical Skills
Source: PubMed Central journal article supplement (PMC5785190; doi:10.5811/westjem.2017.10.36691), 2017-12-22
Supplement: wjem-19-177-s002.pdf [file wjem-19-177-s002.pdf]

**Default Question Block**

Your name:

Your partner's name:

Name of faculty that you worked with:

Where did you complete your sessions? (select all that apply)

- Adult Emergency Department
- Pediatric Emergency Department
- VA Emergency Department
- Critical Care / Short Stay / EC3
- Other Inpatient

How many 4hr sessions did you work with your faculty? (if you attended an entire shift for 8 hrs or more, count as two sessions)

On average, how many patients did you see each shift?

Clinical reasoning activities:

|                                                                            | How frequently did you and your partner do the following? |                       |                       |                       | How much did this activity contribute to learning? |                       |                       |
|----------------------------------------------------------------------------|-----------------------------------------------------------|-----------------------|-----------------------|-----------------------|----------------------------------------------------|-----------------------|-----------------------|
|                                                                            | Every session                                             | Most Sessions         | Some Sessions         | Never                 | A great deal                                       | A moderate amount     | Not at all            |
| Took a patient history without faculty present                             | <input type="radio"/>                                     | <input type="radio"/> | <input type="radio"/> | <input type="radio"/> | <input type="radio"/>                              | <input type="radio"/> | <input type="radio"/> |
| Performed a physical exam without faculty present                          | <input type="radio"/>                                     | <input type="radio"/> | <input type="radio"/> | <input type="radio"/> | <input type="radio"/>                              | <input type="radio"/> | <input type="radio"/> |
| Took a patient history while supervised by faculty                         | <input type="radio"/>                                     | <input type="radio"/> | <input type="radio"/> | <input type="radio"/> | <input type="radio"/>                              | <input type="radio"/> | <input type="radio"/> |
| Performed a physical exam while supervised by faculty                      | <input type="radio"/>                                     | <input type="radio"/> | <input type="radio"/> | <input type="radio"/> | <input type="radio"/>                              | <input type="radio"/> | <input type="radio"/> |
| Gave an oral presentation of history/physical exam findings                | <input type="radio"/>                                     | <input type="radio"/> | <input type="radio"/> | <input type="radio"/> | <input type="radio"/>                              | <input type="radio"/> | <input type="radio"/> |
| Gave a written summary of history/physical exam findings                   | <input type="radio"/>                                     | <input type="radio"/> | <input type="radio"/> | <input type="radio"/> | <input type="radio"/>                              | <input type="radio"/> | <input type="radio"/> |
| Saw at least one patient relevant to the current sequence we were studying | <input type="radio"/>                                     | <input type="radio"/> | <input type="radio"/> | <input type="radio"/> | <input type="radio"/>                              | <input type="radio"/> | <input type="radio"/> |
| Appreciated abnormal physiology of a condition                             | -                                                         | -                     | -                     | -                     | -                                                  | -                     | -                     |

|                                                                                                                           |                       |                       |                       |                       |                       |                       |                       |
|---------------------------------------------------------------------------------------------------------------------------|-----------------------|-----------------------|-----------------------|-----------------------|-----------------------|-----------------------|-----------------------|
| we were currently studying                                                                                                | <input type="radio"/> | <input type="radio"/> | <input type="radio"/> | <input type="radio"/> | <input type="radio"/> | <input type="radio"/> | <input type="radio"/> |
| Appreciated abnormal physiology of a condition we had learned in prior sequences                                          | <input type="radio"/> | <input type="radio"/> | <input type="radio"/> | <input type="radio"/> | <input type="radio"/> | <input type="radio"/> | <input type="radio"/> |
| Saw at least one patient with a condition we had not covered in coursework                                                | <input type="radio"/> | <input type="radio"/> | <input type="radio"/> | <input type="radio"/> | <input type="radio"/> | <input type="radio"/> | <input type="radio"/> |
| Were asked to provide a differential diagnosis for a patient                                                              | <input type="radio"/> | <input type="radio"/> | <input type="radio"/> | <input type="radio"/> | <input type="radio"/> | <input type="radio"/> | <input type="radio"/> |
| Were asked to provide an assessment and plan for a patient (e.g. which tests should be ordered, possible treatments, etc) | <input type="radio"/> | <input type="radio"/> | <input type="radio"/> | <input type="radio"/> | <input type="radio"/> | <input type="radio"/> | <input type="radio"/> |
| Looked at X-Ray, CT, MRI or other radiological tests from a patient that we saw                                           | <input type="radio"/> | <input type="radio"/> | <input type="radio"/> | <input type="radio"/> | <input type="radio"/> | <input type="radio"/> | <input type="radio"/> |
| Examined lab tests or blood work from a patient that we saw                                                               | <input type="radio"/> | <input type="radio"/> | <input type="radio"/> | <input type="radio"/> | <input type="radio"/> | <input type="radio"/> | <input type="radio"/> |
| Other: <input type="text"/>                                                                                               | <input type="radio"/> | <input type="radio"/> | <input type="radio"/> | <input type="radio"/> | <input type="radio"/> | <input type="radio"/> | <input type="radio"/> |
| Other: <input type="text"/>                                                                                               | <input type="radio"/> | <input type="radio"/> | <input type="radio"/> | <input type="radio"/> | <input type="radio"/> | <input type="radio"/> | <input type="radio"/> |

Interaction with faculty:

|                                                                       | How frequently did your faculty do the following? |                       |                       |                       | How much did this activity contribute to learning? |                       |                       |
|-----------------------------------------------------------------------|---------------------------------------------------|-----------------------|-----------------------|-----------------------|----------------------------------------------------|-----------------------|-----------------------|
|                                                                       | Every session                                     | Most Sessions         | Some Sessions         | Never                 | A great deal                                       | A moderate amount     | Not at all            |
| Gave feedback on physical exam technique                              | <input type="radio"/>                             | <input type="radio"/> | <input type="radio"/> | <input type="radio"/> | <input type="radio"/>                              | <input type="radio"/> | <input type="radio"/> |
| Gave feedback on oral presentation technique                          | <input type="radio"/>                             | <input type="radio"/> | <input type="radio"/> | <input type="radio"/> | <input type="radio"/>                              | <input type="radio"/> | <input type="radio"/> |
| Explained a disease or condition I was unfamiliar with                | <input type="radio"/>                             | <input type="radio"/> | <input type="radio"/> | <input type="radio"/> | <input type="radio"/>                              | <input type="radio"/> | <input type="radio"/> |
| Explained lab values or test results from a patient                   | <input type="radio"/>                             | <input type="radio"/> | <input type="radio"/> | <input type="radio"/> | <input type="radio"/>                              | <input type="radio"/> | <input type="radio"/> |
| Explained an X-Ray, CT, MRI or other radiological test from a patient | <input type="radio"/>                             | <input type="radio"/> | <input type="radio"/> | <input type="radio"/> | <input type="radio"/>                              | <input type="radio"/> | <input type="radio"/> |
| Asked me questions about classic disease presentation / "pimped" me   | <input type="radio"/>                             | <input type="radio"/> | <input type="radio"/> | <input type="radio"/> | <input type="radio"/>                              | <input type="radio"/> | <input type="radio"/> |
| Exposed us to a variety of patients and chief complaints              | <input type="radio"/>                             | <input type="radio"/> | <input type="radio"/> | <input type="radio"/> | <input type="radio"/>                              | <input type="radio"/> | <input type="radio"/> |
| Other: <input type="text"/>                                           | <input type="radio"/>                             | <input type="radio"/> | <input type="radio"/> | <input type="radio"/> | <input type="radio"/>                              | <input type="radio"/> | <input type="radio"/> |
| Other: <input type="text"/>                                           | <input type="radio"/>                             | <input type="radio"/> | <input type="radio"/> | <input type="radio"/> | <input type="radio"/>                              | <input type="radio"/> | <input type="radio"/> |

After an average session with my faculty member, I.... (select all that apply)

- Felt like I understood a disease process better
- Recalled a patient that I saw in an ED visit while taking an exam
- Read / learned more about a condition I saw in the ED after the session was over
- Followed up / asked about a patient I had seen on a previous session

Overall, the learning experience with my faculty member was:

- Excellent
- Good
- Average
- Poor
- Terrible

As thanks for participating in the Clinical Reasoning Elective, we provide faculty with a letter that they may include in their file for promotion. Please write 2-3 sentences describing how your faculty member helped you learn during this experience.

How could your faculty member have improved your learning experience?

Was it helpful for you to have a partner for this experience?

- Yes
- No
- Unsure

To what extent did the CRE help you:

|                                                                           | A great deal          | A lot                 | A moderate amount     | A little              | Not at a              |
|---------------------------------------------------------------------------|-----------------------|-----------------------|-----------------------|-----------------------|-----------------------|
| Learn sequence material                                                   | <input type="radio"/> | <input type="radio"/> | <input type="radio"/> | <input type="radio"/> | <input type="radio"/> |
| Feel comfortable interacting with real patients                           | <input type="radio"/> | <input type="radio"/> | <input type="radio"/> | <input type="radio"/> | <input type="radio"/> |
| Feel comfortable presenting to faculty                                    | <input type="radio"/> | <input type="radio"/> | <input type="radio"/> | <input type="radio"/> | <input type="radio"/> |
| Feel comfortable asking questions / interacting with attending physicians | <input type="radio"/> | <input type="radio"/> | <input type="radio"/> | <input type="radio"/> | <input type="radio"/> |
| Become familiar with looking at scans / radiological tests                | <input type="radio"/> | <input type="radio"/> | <input type="radio"/> | <input type="radio"/> | <input type="radio"/> |
| Understand issues related to insurance coverage and access to care        | <input type="radio"/> | <input type="radio"/> | <input type="radio"/> | <input type="radio"/> | <input type="radio"/> |
| Develop differential diagnoses for common chief complaints                | <input type="radio"/> | <input type="radio"/> | <input type="radio"/> | <input type="radio"/> | <input type="radio"/> |

To what extent did the CRE help you prepare for the following components of the M2 CCA?

|                     | A great deal          | A lot                 | A moderate amount     | A little              | Not at a              |
|---------------------|-----------------------|-----------------------|-----------------------|-----------------------|-----------------------|
| History Taking      | <input type="radio"/> | <input type="radio"/> | <input type="radio"/> | <input type="radio"/> | <input type="radio"/> |
| Physical Exam       | <input type="radio"/> | <input type="radio"/> | <input type="radio"/> | <input type="radio"/> | <input type="radio"/> |
| Communication       | <input type="radio"/> | <input type="radio"/> | <input type="radio"/> | <input type="radio"/> | <input type="radio"/> |
| Verbal Presentation | <input type="radio"/> | <input type="radio"/> | <input type="radio"/> | <input type="radio"/> | <input type="radio"/> |
| Case Write-up       | <input type="radio"/> | <input type="radio"/> | <input type="radio"/> | <input type="radio"/> | <input type="radio"/> |
| Overall             | <input type="radio"/> | <input type="radio"/> | <input type="radio"/> | <input type="radio"/> | <input type="radio"/> |

Throughout M1 and M2 year we gain clinical reasoning skills through a variety of required and extracurricular activities. Please rank the following activities with 1 being the most valuable and 7 being the least valuable for developing your clinical reasoning skills.

Clinical Reasoning Elective

Clinical Foundations of Medicine (CFM) Small Group Sessions

One-on-one CEP sessions with CFM faculty and standardized patients

Shadowing (set up by individual student)

Shadowing (set up through a student org or interest group)

M1 Standardized Patient Program (SPI)

M1 Sequence Small Groups

M2 Sequence Small Groups

Other

How would you describe your interest in Emergency Medicine as a potential specialty?

|                          | My top choice         | Very interested       | Somewhat interested   | Not at all interes    |
|--------------------------|-----------------------|-----------------------|-----------------------|-----------------------|
| Before taking the CRE    | <input type="radio"/> | <input type="radio"/> | <input type="radio"/> | <input type="radio"/> |
| After completing the CRE | <input type="radio"/> | <input type="radio"/> | <input type="radio"/> | <input type="radio"/> |

Overall, the Clinical Reasoning Elective contributed to my learning:

- A great deal
- A lot
- A moderate amount
- A little
- None at all

Please provide any comments/suggestions on how the Clinical Reasoning Elective could be improved:
